# Supplementary material
Source: bioRxiv or medRxiv preprint supplement (https://medrxiv.org/highwire/filestream/74986/field_highwire_adjunct_files/0/2020.03.26.20044446-1.pdf)
Supplement: Supplementary file [file 2020.03.26.20044446-1.pdf]

# Supplementary Appendix

## Early Spread of SARS-Cov-2 in the Icelandic Population

Daniel F Gudbjartsson et al.

### Table of content

|                       | Page |
|-----------------------|------|
| Supplementary table 1 | 2    |
| Supplementary table 2 | 5    |
| Supplementary table 3 | 8    |

**Table S1**

| name               | pool        | seq                           | length | %gc   | tm    |
|--------------------|-------------|-------------------------------|--------|-------|-------|
| nCoV-2019_1_LEFT   | nCoV-2019_1 | ACCAACCAACTTTCGATCTCTTGT      | 24     | 41.67 | 60.69 |
| nCoV-2019_2_RIGHT  | nCoV-2019_2 | TAAGGATCAGTGCCAAGCTCGT        | 22     | 50    | 61.74 |
| nCoV-2019_3_LEFT   | nCoV-2019_1 | CGGTAATAAAGGAGCTGGTGGC        | 22     | 54.55 | 61.32 |
| nCoV-2019_4_RIGHT  | nCoV-2019_2 | CACAAGTAGTGGCACCTTCTTTAGT     | 25     | 44    | 60.97 |
| nCoV-2019_5_LEFT   | nCoV-2019_1 | TGGTGAAACTTCATGGCAGACG        | 22     | 50    | 61.39 |
| nCoV-2019_6_RIGHT  | nCoV-2019_2 | TAGCGGCCTTCTGTAAAACACG        | 22     | 50    | 61.18 |
| nCoV-2019_7_LEFT   | nCoV-2019_1 | ATCAGAGGCTGCTCGTGTGTA         | 22     | 50    | 61.73 |
| nCoV-2019_8_RIGHT  | nCoV-2019_2 | GCTTCAACAGCTTCACTAGTAGGT      | 24     | 45.83 | 60.56 |
| nCoV-2019_9_LEFT   | nCoV-2019_1 | TCCCACAGAAGTGTTAACAGAGGA      | 24     | 45.83 | 61.18 |
| nCoV-2019_10_RIGHT | nCoV-2019_2 | TCATCTAACCAATCTTCTTCTTGCTCT   | 27     | 37.04 | 60.31 |
| nCoV-2019_11_LEFT  | nCoV-2019_1 | GGAATTTGGTGCCACTTCTGCT        | 22     | 50    | 61.66 |
| nCoV-2019_12_RIGHT | nCoV-2019_2 | TTCACTCTTCATTTCCAAAAAGCTTGA   | 27     | 33.33 | 60.36 |
| nCoV-2019_13_LEFT  | nCoV-2019_1 | TCGCACAAATGTCTACTTAGCTGT      | 24     | 41.67 | 60.56 |
| nCoV-2019_14_RIGHT | nCoV-2019_2 | AGTTTCCACACAGACAGGCATT        | 22     | 45.45 | 60.42 |
| nCoV-2019_15_LEFT  | nCoV-2019_1 | ACAGTGCTTAAAAAGTGAAAAAGTGCC   | 27     | 37.04 | 61.32 |
| nCoV-2019_16_RIGHT | nCoV-2019_2 | CACAACCTGCGTGTGGAGGTTA        | 22     | 50    | 61.32 |
| nCoV-2019_17_LEFT  | nCoV-2019_1 | CTTCTTTCTTTGAGAGAAGTGAGGACT   | 27     | 40.74 | 60.69 |
| nCoV-2019_18_RIGHT | nCoV-2019_2 | AGCTTGTTTACCACACGTACAAGG      | 24     | 45.83 | 61.51 |
| nCoV-2019_19_LEFT  | nCoV-2019_1 | GCTGTTATGTACATGGGCACACT       | 23     | 47.83 | 61.18 |
| nCoV-2019_20_RIGHT | nCoV-2019_2 | ACGTGGCTTTATTAGTTGCATTGTT     | 25     | 36    | 60.28 |
| nCoV-2019_21_LEFT  | nCoV-2019_1 | TGGCTATTGATTATAAACTACACACCC   | 29     | 37.93 | 61.49 |
| nCoV-2019_22_RIGHT | nCoV-2019_2 | ACAGTATTCTTTGCTATAGTAGTCGGC   | 27     | 40.74 | 60.73 |
| nCoV-2019_23_LEFT  | nCoV-2019_1 | ACAACACTAACATAGTTACACGGTGT    | 27     | 37.04 | 60.26 |
| nCoV-2019_24_RIGHT | nCoV-2019_2 | ACATTCTAACCATAGCTGAAATCGGG    | 26     | 42.31 | 61.19 |
| nCoV-2019_25_LEFT  | nCoV-2019_1 | GCAATTGTTTTTCAGCTATTTTGCAGT   | 27     | 33.33 | 60.73 |
| nCoV-2019_26_RIGHT | nCoV-2019_2 | TCCGCACTATACCAACATCAG         | 22     | 50    | 60.42 |
| nCoV-2019_27_LEFT  | nCoV-2019_1 | ACTACAGTCAGCTTATGTGTCAACC     | 25     | 44    | 60.8  |
| nCoV-2019_28_RIGHT | nCoV-2019_2 | TGTTTAGACATGACATGAACAGGTGT    | 26     | 38.46 | 60.91 |
| nCoV-2019_29_LEFT  | nCoV-2019_1 | ACTTGTGTTCTTTTTGTTGCTGC       | 24     | 41.67 | 61.39 |
| nCoV-2019_30_RIGHT | nCoV-2019_2 | ACCACTAGTAGATACAAAAACCCAG     | 26     | 42.31 | 60.3  |
| nCoV-2019_31_LEFT  | nCoV-2019_1 | TTCTGAGTACTGTAGGCACGGC        | 22     | 54.55 | 62.03 |
| nCoV-2019_32_RIGHT | nCoV-2019_2 | AGCACATCACTACGCAACTTTAGA      | 24     | 41.67 | 60.56 |
| nCoV-2019_33_LEFT  | nCoV-2019_1 | ACTTTTGAAGAAGCTGCGCTGT        | 22     | 45.45 | 61.58 |
| nCoV-2019_34_RIGHT | nCoV-2019_2 | AGTGAAATTGGGCCTCATAGCA        | 22     | 45.45 | 60.03 |
| nCoV-2019_35_LEFT  | nCoV-2019_1 | TGTTTCGATTCAACCAGGACAG        | 22     | 50    | 61.39 |
| nCoV-2019_36_RIGHT | nCoV-2019_2 | GAACAAAGACCATTGAGTACTCTGGA    | 26     | 42.31 | 60.74 |
| nCoV-2019_37_LEFT  | nCoV-2019_1 | ACACACCACTGGTTGTTACTCAC       | 23     | 47.83 | 60.93 |
| nCoV-2019_38_RIGHT | nCoV-2019_2 | CACCAAGAGTCAGTCTAAAGTAGCG     | 25     | 48    | 61.13 |
| nCoV-2019_39_LEFT  | nCoV-2019_1 | AGTATTGCCCTATTTTCTTCATAACTGGT | 29     | 34.48 | 61    |
| nCoV-2019_40_RIGHT | nCoV-2019_2 | CATGGCTGCATCACGGTCAAAT        | 22     | 50    | 62.09 |
| nCoV-2019_41_LEFT  | nCoV-2019_1 | GTTCCCTTCCATCATATGCAGCT       | 23     | 47.83 | 60.75 |
| nCoV-2019_42_RIGHT | nCoV-2019_2 | CCTACCTCCCTTTGTTGTGTTGT       | 23     | 47.83 | 60.69 |
| nCoV-2019_43_LEFT  | nCoV-2019_1 | TACGACAGATGTCTTGTGCTGC        | 22     | 50    | 60.93 |
| nCoV-2019_44_RIGHT | nCoV-2019_2 | AACCTTTCCACATACCGCAGAC        | 22     | 50    | 60.87 |

|                    |             |                               |    |       |       |
|--------------------|-------------|-------------------------------|----|-------|-------|
| nCoV-2019_45_LEFT  | nCoV-2019_1 | TACCTACAACCTGTGCTAATGACCC     | 25 | 44    | 60.57 |
| nCoV-2019_46_RIGHT | nCoV-2019_2 | CACGTTACCTAAGTTGGCGTA         | 22 | 50    | 60.86 |
| nCoV-2019_47_LEFT  | nCoV-2019_1 | AGGACTGGTATGATTTTGTAGAAAACCC  | 28 | 39.29 | 61.42 |
| nCoV-2019_48_RIGHT | nCoV-2019_2 | TAGATTACCAGAAGCAGCGTGC        | 22 | 50    | 60.74 |
| nCoV-2019_49_LEFT  | nCoV-2019_1 | AGGAATTACTIONTGTGTATGCTGCTGA  | 25 | 40    | 60.57 |
| nCoV-2019_50_RIGHT | nCoV-2019_2 | TAACATGTTGTGCCAACCA           | 22 | 45.45 | 60.95 |
| nCoV-2019_51_LEFT  | nCoV-2019_1 | TCAATAGCCGCCACTAGAGGAG        | 22 | 54.55 | 61.34 |
| nCoV-2019_52_RIGHT | nCoV-2019_2 | GTTGAGAGCAAAATTCATGAGGTCC     | 25 | 44    | 60.62 |
| nCoV-2019_53_LEFT  | nCoV-2019_1 | AGCAAAATGTTGGACTGAGACTGA      | 24 | 41.67 | 60.69 |
| nCoV-2019_54_RIGHT | nCoV-2019_2 | AACCAAAAACTGTCCATTAGCACA      | 25 | 36    | 60.11 |
| nCoV-2019_55_LEFT  | nCoV-2019_1 | ACTCAACTTACTTAGGAGGTATGAGCT   | 28 | 39.29 | 61.43 |
| nCoV-2019_56_RIGHT | nCoV-2019_2 | ACACTATGCGAGCAGAAGGGTA        | 22 | 50    | 61.21 |
| nCoV-2019_57_LEFT  | nCoV-2019_1 | ATTCTACTCCAGGGACCACC          | 22 | 54.55 | 61.16 |
| nCoV-2019_58_RIGHT | nCoV-2019_2 | CTTTTCTCCAAGCAGGGTTACGT       | 23 | 47.83 | 61.06 |
| nCoV-2019_59_LEFT  | nCoV-2019_1 | TCACGCATGATGTTTCATCTGCA       | 23 | 43.48 | 61.42 |
| nCoV-2019_60_RIGHT | nCoV-2019_2 | GGTACCAACAGCTTCTCTAGTAGC      | 24 | 50    | 60.44 |
| nCoV-2019_61_LEFT  | nCoV-2019_1 | TGTTTATCACCCGGAAGAAGC         | 22 | 50    | 61.5  |
| nCoV-2019_62_RIGHT | nCoV-2019_2 | GTTGAACCTTTCTACAAGCCGC        | 22 | 50    | 60.35 |
| nCoV-2019_63_LEFT  | nCoV-2019_1 | TGTTAAGCGTGTTGACTGGACT        | 22 | 45.45 | 60.16 |
| nCoV-2019_64_RIGHT | nCoV-2019_2 | AGTCTGTAAAAGTGTTCAGAGGT       | 25 | 40    | 60.1  |
| nCoV-2019_65_LEFT  | nCoV-2019_1 | GCTGGCTTTAGCTGTGGGTTT         | 22 | 50    | 61.92 |
| nCoV-2019_66_RIGHT | nCoV-2019_2 | TCAATTTCCATTTGACTCTGGGT       | 24 | 41.67 | 60.45 |
| nCoV-2019_67_LEFT  | nCoV-2019_1 | GTTGTCCAACAATTACCTGAACTTACT   | 28 | 35.71 | 60.43 |
| nCoV-2019_68_RIGHT | nCoV-2019_2 | CTCCTTTATCAGAACCAGCACCA       | 23 | 47.83 | 60.31 |
| nCoV-2019_69_LEFT  | nCoV-2019_1 | TGTCGCAAAATATACTCAACTGTGTCA   | 27 | 37.04 | 61.43 |
| nCoV-2019_70_RIGHT | nCoV-2019_2 | TGACCTTCTTTAAAGACATAACAGCAG   | 28 | 35.71 | 60.27 |
| nCoV-2019_71_LEFT  | nCoV-2019_1 | ACAAATCCAATTCAGTTGTCTTCTATTC  | 29 | 34.48 | 60.54 |
| nCoV-2019_72_RIGHT | nCoV-2019_2 | ACTCTGAACCTCACTTCCATCCAAC     | 25 | 44    | 60.97 |
| nCoV-2019_73_LEFT  | nCoV-2019_1 | CAATTTTGTAAATGATCCATTTTGGGTGT | 29 | 31.03 | 60.29 |
| nCoV-2019_74_RIGHT | nCoV-2019_2 | GCAACACAGTTGCTGATTCTCTTC      | 24 | 45.83 | 60.85 |
| nCoV-2019_75_LEFT  | nCoV-2019_1 | AGAGTCCAACCAACAGAATCTATTGT    | 26 | 38.46 | 60.24 |
| nCoV-2019_76_RIGHT | nCoV-2019_2 | ACACCTGTGCCTGTAAACCAT         | 22 | 45.45 | 60.42 |
| nCoV-2019_77_LEFT  | nCoV-2019_1 | CCAGCAACTGTTTGTGGACCTA        | 22 | 50    | 60.75 |
| nCoV-2019_78_RIGHT | nCoV-2019_2 | TGTGTACAAAACTGCCATATTGCA      | 25 | 36    | 60.22 |
| nCoV-2019_79_LEFT  | nCoV-2019_1 | GTGGTGATTCAACTGAATGCAGC       | 23 | 47.83 | 60.92 |
| nCoV-2019_80_RIGHT | nCoV-2019_2 | TGGAGCTAAGTTGTTTAAACAAGCG     | 24 | 41.67 | 60.02 |
| nCoV-2019_81_LEFT  | nCoV-2019_1 | GCACTTGAAAACTTCAAGATGTGG      | 25 | 44    | 61.24 |
| nCoV-2019_82_RIGHT | nCoV-2019_2 | TGCCAGAGATGTCACCTAAATCAA      | 24 | 41.67 | 60.02 |
| nCoV-2019_83_LEFT  | nCoV-2019_1 | TCCTTTGCAACCTGAATTAGACTCA     | 25 | 40    | 60.46 |
| nCoV-2019_84_RIGHT | nCoV-2019_2 | AGGTGTGAGTAAACTGTTACAAACAAC   | 27 | 37.04 | 60.36 |
| nCoV-2019_85_LEFT  | nCoV-2019_1 | ACTAGCACTCTCAAGGGTGTT         | 22 | 50    | 61.03 |
| nCoV-2019_86_RIGHT | nCoV-2019_2 | ACGAAAGCAAGAAAAAGAAGTACGC     | 25 | 40    | 61.01 |
| nCoV-2019_87_LEFT  | nCoV-2019_1 | CGACTACTAGCGTGCCTTTGTA        | 22 | 50    | 60.16 |
| nCoV-2019_88_RIGHT | nCoV-2019_2 | TGGTCAGAATAGTGCCATGGAGT       | 23 | 47.83 | 61.4  |
| nCoV-2019_89_LEFT  | nCoV-2019_1 | GTACGCGTTCATGTGGTCATT         | 22 | 50    | 61.5  |
| nCoV-2019_90_RIGHT | nCoV-2019_2 | TGAAATGGTGAATTGCCCTCGT        | 22 | 45.45 | 60.82 |

|                    |             |                              |    |       |       |
|--------------------|-------------|------------------------------|----|-------|-------|
| nCoV-2019_91_LEFT  | nCoV-2019_1 | TCACTACCAAGAGTGTGTTAGAGGT    | 25 | 44    | 60.93 |
| nCoV-2019_92_RIGHT | nCoV-2019_2 | AGGTTCTGGCAATTAATTGTAAGG     | 27 | 37.04 | 60.53 |
| nCoV-2019_93_LEFT  | nCoV-2019_1 | TGAGGCTGGTTCTAAATCACCCA      | 23 | 47.83 | 61.59 |
| nCoV-2019_94_RIGHT | nCoV-2019_2 | TTTGGCAATGTTGTTCTTGAGG       | 23 | 43.48 | 60.18 |
| nCoV-2019_95_LEFT  | nCoV-2019_1 | TGAGGGAGCCTTGAATACACCA       | 22 | 50    | 61.1  |
| nCoV-2019_96_RIGHT | nCoV-2019_2 | TAGGCTCTGTTGGTGGGAATGT       | 22 | 50    | 61.36 |
| nCoV-2019_97_LEFT  | nCoV-2019_1 | TGGATGACAAAGATCCAAATTTCAAAGA | 28 | 32.14 | 60.22 |
| nCoV-2019_98_RIGHT | nCoV-2019_2 | TTCTCCTAAGAAGCTATTAATCACATGG | 30 | 33.33 | 60.01 |

**Table S2 Illumina indexes used in sequencing**

**Well i7 index**

1. A1 CCGCGGTT
2. A2 AGTTCAGG
3. A3 TAATACAG
4. A4 ACTAAGAT
5. A5 TACCGAGG
6. A6 ATATGGAT
7. A7 ATATCTCG
8. A8 TGC GGCGT
9. A9 AACTAAG
10. A10 CAATTAAC
11. A11 AACTGTAG
12. A12 TATCGCAC

1. B1 TTATAACC
2. B2 GACCTGAA
3. B3 CGGCGTGA
4. B4 GTCGGAGC
5. B5 CGTTAGAA
6. B6 GCGCAAGC
7. B7 GCGCTCTA
8. B8 CATAATAC
9. B9 GTGTCGGA
10. B10 TGGCCGGT
11. B11 GGTCACGA
12. B12 CGCTATGT

1. C1 GGA CTTG
2. C2 TCTCTACT
3. C3 ATGTAAGT
4. C4 CTTGGTAT
5. C5 AGCCTCAT
6. C6 AAGATACT
7. C7 AACAGGTT
8. C8 GATCTATC
9. C9 TTCCTGTT
10. C10 AGTACTCC
11. C11 CTGCTTCC
12. C12 GTATGTTC

1. D1 AAGTCCAA
2. D2 CTCTCGTC
3. D3 GCACGGAC
4. D4 TCCAACGC

**i5 index**

AGCGCTAG CCAACAGA ATATTCAC AACCGCGG CCTGAACT CTGTATTA ATCTTAGT CCTCGGTA  
ATCCATAT CGAGATAT ACGCCGCA CTTAGTGT GATATCGA TTGGTGAG GCGCCTGT GGTTATAA  
TTCAGGTC TCACGCCG GCTCCGAC TTCTAACG GCTTGCGC TAGAGCGC GTATTATG TCCGACAC  
CGCAGACG CGCGGTTT ACTCTATG CCAAGTCC AGTAGAGA ACTTACAT ATACCAAG ATGAGGCT  
AGTATCTT AACCTGTT GATAGATC AACAGGAA TATGAGTA TATAACCT GTCTCGCA TTGGACTT

5. D5 GATTCTGC
6. D6 GGAGCGTC
7. D7 GGTGAACC
8. D8 AGCTCGCT
9. D9 CCTTCACC
10. D10 GACGTCTT
11. D11 TCATCCTT
12. D12 ACGCACCT

1. E1 ATCCACTG
2. E2 CCAAGTCT
3. E3 GGTACCTT
4. E4 CCGTGAAG
5. E5 TCGTAGTG
6. E6 ATGGCATG
7. E7 CAACAATG
8. E8 CGGAACTG
9. E9 GCCACAGG
10. E10 TGCGAGAC
11. E11 AGGTTATA
12. E12 TACTCATA

1. F1 GCTTGTC A
2. F2 TTGGACTC
3. F3 AACGTTCC
4. F4 TTACAGGA
5. F5 CTACGACA
6. F6 GCAATGCA
7. F7 TGGTGGCA
8. F8 TAAGGTCA
9. F9 ATTGTGAA
10. F10 CATAGAGT
11. F11 GAACCGCG
12. F12 CGTCTGCG

1. G1 CAAGCTAG
2. G2 GGCTTAAG
3. G3 GCAGAATT
4. G4 GGCATTCT
5. G5 TAAGTGGT
6. G6 GTTCCAAT
7. G7 AGGCAGAG
8. G8 TTGCCTAG

9. G9 ACTCGTGT
10. G10 ACAGGCGC
11. G11 CTCACCAA

GACGAGAG GTCCGTGC GCGTTGGA GCAGAATC GACGCTCC GGTTCCACC AGCGAGCT GGTGAAGG  
AGGTGCGT AAGGATGA AAGACGTC CAGTGGAT AGACTTGG AAGGTACC CTTACCGG CACTACGA  
CATGCCAT CATTGTTG CAGTTCCG CCTGTGGC GAACATAC GGAAGCAG GGAGTACT TGACAAGC  
GAGTCCAA GGAACGTT TCCTGTAA TGTCGTAG TGCATTGC TGCCACCA TGACCTTA TTCACAAT  
ACATAGCG TCGTGACC ACCGGCCA CTAGCTTG CTTAAGCC AATTCTGC AGAATGCC ACCACTTA  
ATTGGAAC CTCTGCCT CTAGGCAA

G12 TCGATATC

1. H1 TGGATCGA
2. H2 AATCCGGA
3. H3 ATGAGGCC
4. H4 AATGCCTC
5. H5 CGGACAAC
6. H6 ACCTTGGC
7. H7 GAATGAGA
8. H8 CCATTCTGA
9. H9 GTCTACAC
10. H10 GTGAATAT
11. H11 TCTGTTGG
12. H12 CTAGCGCT

ACACGAGT GTGCGATA CTACAGTT GTTAATTG TCGATCCA TCCGGATT GGCCTCAT GAGGCATT  
GTTGTCCG GCCAAGGT TCTCATTC TCGAATGG GTGTAGAC

**Table S3 Sequence variants used to define clades.**

| Clade | Pos   | Ref   | Alt |
|-------|-------|-------|-----|
| B     | 8782  | C     | T   |
| B     | 28144 | T     | C   |
| B1    | 18060 | C     | T   |
| B1a   | 17747 | C     | T   |
| B1a   | 17858 | A     | G   |
| B4    | 28878 | G     | A   |
| B4    | 29742 | G     | A   |
| B2    | 29095 | C     | T   |
| A     | 20229 | C     | T   |
| A     | 13064 | C     | T   |
| A     | 18483 | T     | C   |
| A     | 8017  | A     | G   |
| A1a   | 26144 | G     | T   |
| A1a   | 17247 | T     | C   |
| A2    | 241   | C     | T   |
| A2    | 3037  | C     | T   |
| A2    | 23403 | A     | G   |
| A2a   | 14408 | C     | T   |
| A2a1  | 28881 | G     | A   |
| A2a1  | 28882 | G     | A   |
| A2a1  | 28883 | G     | C   |
| A2a1a | 27046 | C     | T   |
| A2a2  | 25563 | G     | T   |
| A2a2a | 1059  | C     | T   |
| A3    | 1397  | G     | A   |
| A3    | 28688 | T     | C   |
| A3    | 29742 | G     | T   |
| A6    | 514   | T     | C   |
| A7    | 9924  | C     | T   |
| A8    | 1440  | G     | A   |
| A8    | 2891  | G     | A   |
| A9    | 1604  | AATGA | AA  |
| A9    | 20270 | C     | T   |
| A10   | 1218  | C     | T   |
| A10   | 27806 | G     | T   |
| A10   | 29711 | G     | T   |
